# Supplementary material for: Children of Senegal River Basin show the highest prevalence of Blastocystis sp. ever observed worldwide
Source: PubMed Central journal article supplement (PMC3987649; doi:10.1186/1471-2334-14-164), 2014-03-25
Supplement: 1471-2334-14-164-S1.pdf [file 1471-2334-14-164-S1.pdf]

Identifiant :

\_\_\_\_\_ P3V

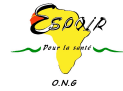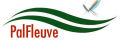

## Questionnaire enfant

### (P3V : Octobre 2011-Etude Schisto-VAN)

Village  A  F  N    Date \_\_\_/oct/2011    Heure : .....    Enquêteur.....    T.ext .....°C  
 Prénom .....    Nom.....     Fille     Garçon  
 Père.....    Mère .....    Ecole, Classe : .....  
 Date de Naissance ...../...../.....    Âge.....    Température auriculaire \_ \_ , \_ °C  
 Qui a répondu ? .....    Lien à l'enfant .....    N° concession .....    Chef.....  
 Liens de parenté avec d'autres enfants de l'étude ? .....  
 Partage l'habitation avec certains de ces enfants ?  oui  non    lesquels ? .....

|                             | Oui | Non | Quand | Durée | Traitement |
|-----------------------------|-----|-----|-------|-------|------------|
| Fièvre récente              |     |     |       |       |            |
| Paludisme récent            |     |     |       |       |            |
| Toux de plus que 3 semaines |     |     |       |       |            |
| Diarrhée                    |     |     |       |       |            |
| Vomissements                |     |     |       |       |            |
| Autres maladies             |     |     |       |       |            |

Hématurie ?  oui  non    Maux de ventre ?  oui  non    Douleurs à la miction ?  oui  non  
 Baignade régulière dans le fleuve ou canaux d'irrigation  oui  non    Fréquence ? .....  
 Heure ? .....    Durée ? .....    Traitement au PZQ ?  oui  non    Quand ? .....  
 Remarques ? .....  
 Voyage ?  oui  non    Où ? .....    Durée ? .....    Il y a combien de temps ? .....

Observations relatives aux **urines** : .....

Observations relatives aux **selles**: .....

Taux d'hémoglobine :  g/dl    Taille 1 : ..... (cm)    Taille 2 : ..... (cm)    Poids: ..... (Kg)

Carnet de vaccination :  oui  oui mais manquant  non    Complètement vacciné  oui  non

BCG .....    Penta 1 .....    Penta 2 .....    Penta 3 .....    Var-VAA .....

Observations : .....

.....
